# Supplementary material
Source: PubMed Central journal article supplement (PMC4877059)

## Supplementary Information

# Structure Activity Relationship of Imidazo-pyridinium Analogs as Antagonists of Neuropeptide S Receptor

*Samarjit Patnaik<sup>a</sup>, Juan J. Marugan<sup>a\*</sup>, Ke Liu<sup>a</sup>, Wei Zheng<sup>a</sup>, Noel Southall<sup>a</sup>, Seameen J. Dehdashti<sup>a</sup>, Annika Thorsell<sup>b</sup>, Markus Heilig<sup>b</sup>, Lauren Bell<sup>b</sup>, Michelle Zook<sup>b</sup>, Bob Eskay<sup>b</sup>, Kyle R. Brimacombe<sup>a</sup>, and Christopher P. Austin<sup>a</sup>*

<sup>a</sup>National Center for Advancing Translational Sciences, National Institutes of Health, 9800 Medical Center Drive, Rockville, 20850, MD, USA.

<sup>b</sup>National Institute on Alcohol Abuse and Alcoholism, National Institutes of Health, Bethesda, 20892, MD, USA

**Table 1.** Profile of **20e** against 55 other targets at @ 10  $\mu$ M at Cerep®.

| <b>20e @ 10 <math>\mu</math>M</b>                | <b>% Inhibition of Control Specific Binding</b> |
|--------------------------------------------------|-------------------------------------------------|
| <b>Assay</b>                                     |                                                 |
| A1 (h) (antagonist radioligand)                  | 18                                              |
| A2A (h) (agonist radioligand)                    | 32                                              |
| A3 (h) (agonist radioligand)                     | 27                                              |
| alpha 1 (non-selective) (antagonist radioligand) | 46                                              |
| alpha 2 (non-selective) (antagonist radioligand) | 14                                              |
| beta 1 (h) (agonist radioligand)                 | 17                                              |
| beta 2 (h) (agonist radioligand)                 | 6                                               |
| AT1 (h) (antagonist radioligand)                 | -25                                             |
| B2 (h) (agonist radioligand)                     | 2                                               |
| CB1 (h) (agonist radioligand)                    | 69                                              |
| CCK1 (CCKA) (h) (agonist radioligand)            | 25                                              |
| D1 (h) (antagonist radioligand)                  | 72                                              |
| D2S (h) (antagonist radioligand)                 | 83                                              |
| ETA (h) (agonist radioligand)                    | 6                                               |
| GABA (non-selective) (agonist radioligand)       | 25                                              |
| GAL2 (h) (agonist radioligand)                   | -24                                             |
| CXCR2 (IL-8B) (h) (agonist radioligand)          | -9                                              |
| CCR1 (h) (agonist radioligand)                   | -13                                             |
| H1 (h) (antagonist radioligand)                  | 37                                              |
| H2 (h) (antagonist radioligand)                  | 23                                              |
| MC4 (h) (agonist radioligand)                    | 48                                              |

|                                                                                          |                                |
|------------------------------------------------------------------------------------------|--------------------------------|
| MT1 (ML1A) (h) (agonist radioligand)                                                     | 57                             |
| M1 (h) (antagonist radioligand)                                                          | 87                             |
| M2 (h) (antagonist radioligand)                                                          | 96, IC <sub>50</sub> = 0.59 μM |
| M3 (h) (antagonist radioligand)                                                          | 93, IC <sub>50</sub> = 1.00 μM |
| NK2 (h) (agonist radioligand)                                                            | 92, IC <sub>50</sub> = 1.5 μM  |
| NK3 (h) (antagonist radioligand)                                                         | 15                             |
| Y1 (h) (agonist radioligand)                                                             | 2                              |
| Y2 (h) (agonist radioligand)                                                             | 41                             |
| NTS1 (NT1) (h) (agonist radioligand)                                                     | -1                             |
| delta 2 (DOP) (h) (agonist radioligand)                                                  | 75                             |
| kappa (KOP) (agonist radioligand)                                                        | 99, IC <sub>50</sub> = 0.21 μM |
| mu (MOP) (h) (agonist radioligand)                                                       | 99, IC <sub>50</sub> = 0.06 μM |
| NOP (ORL1) (h) (agonist radioligand)                                                     | 12                             |
| TP (h) (TXA2/PGH2) (antagonist radioligand)                                              | -10                            |
| 5-HT1A (h) (agonist radioligand)                                                         | 77                             |
| 5-HT1B (antagonist radioligand)                                                          | 15                             |
| 5-HT2A (h) (antagonist radioligand)                                                      | 65                             |
| 5-HT2B (h) (agonist radioligand)                                                         | 6                              |
| 5-HT3 (h) (antagonist radioligand)                                                       | 21                             |
| 5-HT5a (h) (agonist radioligand)                                                         | 34                             |
| 5-HT6 (h) (agonist radioligand)                                                          | 20                             |
| 5-HT7 (h) (agonist radioligand)                                                          | 21                             |
| sst (non-selective) (agonist radioligand)                                                | 43                             |
| VPAC1 (VIP1) (h) (agonist radioligand)                                                   | -12                            |
| V1a (h) (agonist radioligand)                                                            | 12                             |
| Ca <sup>2+</sup> channel (L, verapamil site) (phenylalkylamine) (antagonist radioligand) | 83                             |
| KV channel (antagonist radioligand)                                                      | 55                             |
| SKCa channel (antagonist radioligand)                                                    | -5                             |
| Na <sup>+</sup> channel (site 2) (antagonist radioligand)                                | 106, IC <sub>50</sub> = 0.2 μM |
| Cl <sup>-</sup> channel (GABA-gated) (antagonist radioligand)                            | 32                             |
| norepinephrine transporter (h) (antagonist radioligand)                                  | 86                             |
| dopamine transporter (h) (antagonist radioligand)                                        | 91, IC <sub>50</sub> = 2.9 μM  |
| 5-HT transporter (h) (antagonist radioligand)                                            | 75                             |

---

## 2D NMR spectroscopy on 13b

We performed a detailed structural analysis of **13b** by 2D NMR spectroscopy to elucidate the regiochemistry of alkylation at the N1 imidazole nitrogen with compounds such as **12b** and **12d**. This was an expected outcome as the precedent in Tolmachev et al. (ref 26 in manuscript). The protons 1-4 (see figure **13b** below) were correlated to each other by the COSY experiment. The carbons associated with them and other protons were correlated with a HSQC experiment. A HMBC experiment showed a strong correlation of the quaternary carbon *q1* with the hydrogens at position 5 establishing the alkylation at the imidazole N1 nitrogen. The carbon *q1* also has correlations with the protons at positions 1, 4 and 3 in the HMBC experiment. Finally, a NOESY experiment shows a correlation between the hydrogens at positions 4 and 5 (methyl group).

Further support to the structural assignment was observed in the MS fragmentation of compound **20e**. Thus the LCMS analysis of compound **20e** used in our rat PK study shows  $[M+H]^+$   $m/z$  465.2 and 217.1 MRM transition. Furthermore, exposing compounds **13a** and **13b** to a MS fragmentor with increasing voltage increments leads to formation of the same fragment with mass 217, a fragment common among the analogs.

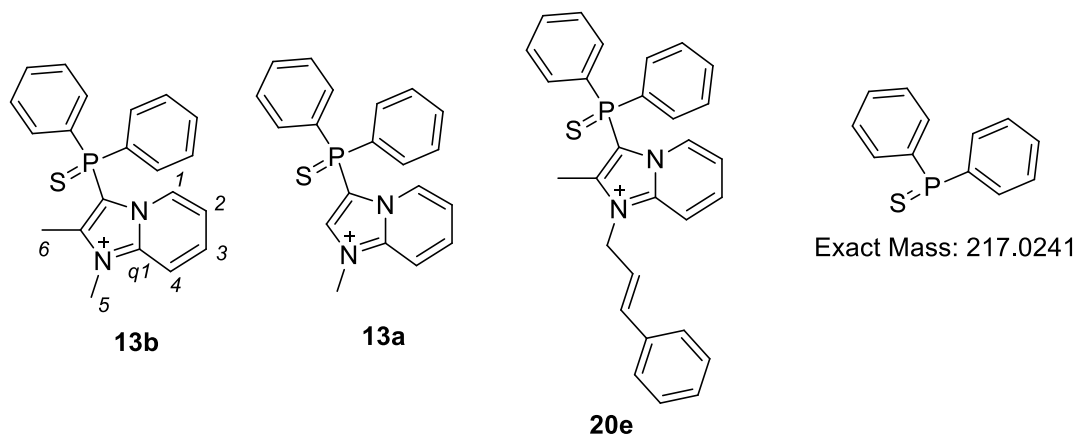

# 1. gCOSY of 13b

Sample Name:  
SPA01-081  
Data collected on:  
nmr1.bogus-vmrs400  
Archive directory:  
/home/Walkup1/vnmrsys/data/patnaiks  
Sample directory:  
SPA01-081\_20130906\_01  
Fidfile: SPA01-081\_gCOSY\_01

Pulse Sequence **gCOSY**  
Solvent: dmsd  
Data collected on: Sep 6 2013

Temp. 25.0 C / 298.1 K  
Sample #26, operator: patnaiks

Relax. delay 1.000 sec  
Acq. time 0.150 sec  
Width 3858.0 Hz  
2D Width 3858.0 Hz  
Single scan  
128 increments  
OBSERVE H1, 399.9388525 MHz  
DATA PROCESSING  
Sq. sine bell 0.075 sec  
F1 DATA PROCESSING  
Sq. sine bell 0.033 sec  
FT size 2048 x 2048  
Total time 3 min 10 sec

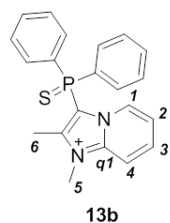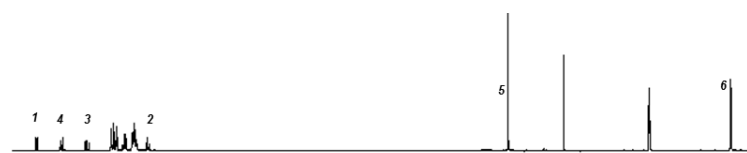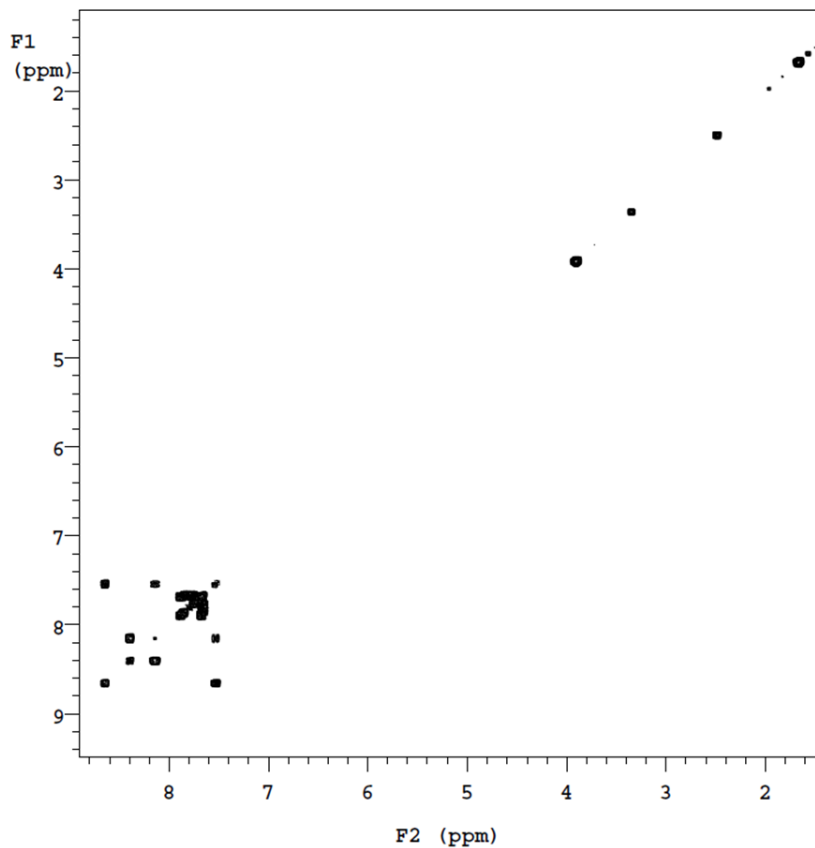

## 2. gCOSY of **13b** (expansion)

Sample Name:  
SPA01-081  
Data Collected on:  
nmr1.bogus-vnmrs400  
Archive directory:  
/home/Walkup1/vnmrsys/data/patnaiks  
Sample directory:  
SPA01-081\_20130906\_01  
FidFile: SPA01-081\_gCOSY\_01

Pulse Sequence: **gCOSY**  
Solvent: dmsd  
Data collected on: Sep 6 2013

Temp. 25.0 C / 298.1 K  
Sample #26, Operator: patnaiks

Relax. delay 1.000 sec  
Acq. time 0.150 sec  
Width 3858.0 Hz  
2D Width 3858.0 Hz  
Single scan  
128 increments  
OBSERVE H1, 399.9388525 MHz  
DATA PROCESSING  
Sq. sine bell 0.075 sec  
F1 DATA PROCESSING  
Sq. sine bell 0.033 sec  
FT size 2048 x 2048  
Total time 3 min 10 sec

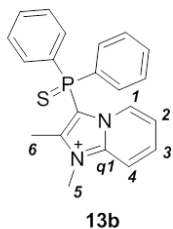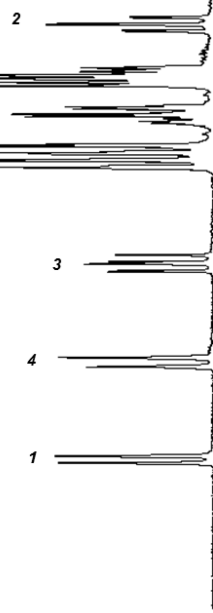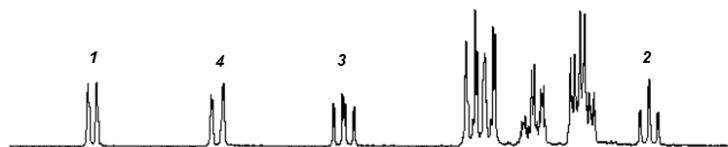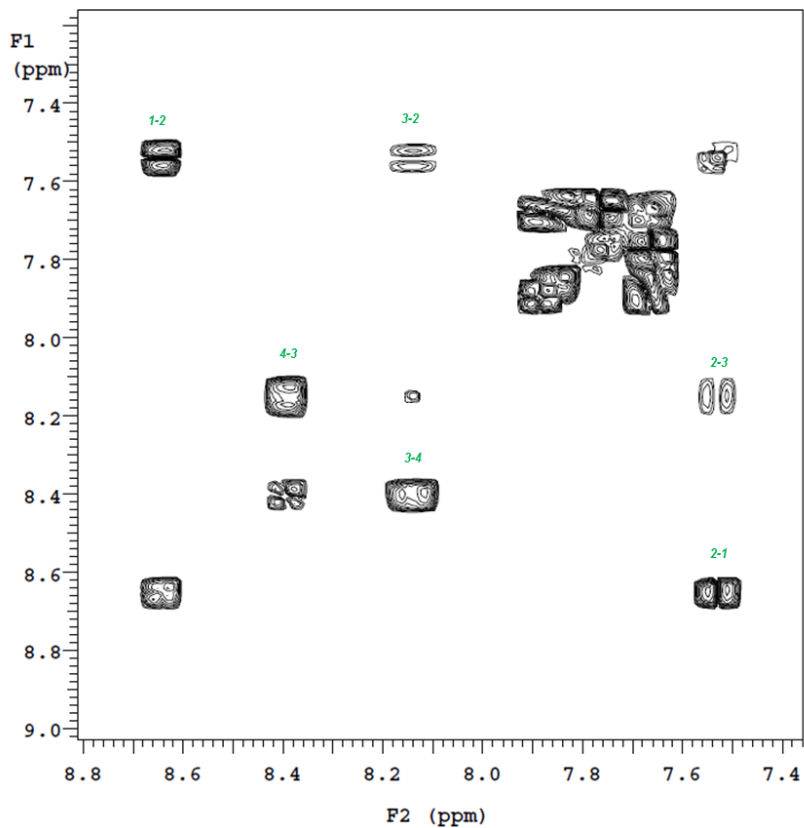

### 3. gHSQCAD of **13b** (expansion)

Sample Name:  
 SPA01-081  
 Data Collected on:  
 nmr2.ncats.nih.gov-vmrns400  
 Archive directory:  
 /home/Walkup2/vmrnsys/data/Walkup2  
 Sample directory:  
 SPA01-081\_20130913\_01  
 FidFile: SPA01-081\_gHSQCAD\_01

Agilent Technologies  
 neg proj

Pulse Sequence: **gHSQCAD**  
 Solvent: dmsd  
 Data collected on: Sep 13 2013

Temp. 25.0 C / 298.1 K  
 Sample #46, Operator: Walkup2

Relax. delay 1.000 sec  
 Acq. time 0.150 sec  
 Width 6410.3 Hz  
 2D Width 20105.6 Hz  
 32 repetitions  
 2 x 512 increments  
 OBSERVE H1, 399.8111706 MHz  
 DECOUPLE C13, 100.5416467 MHz  
 Power 34 dB  
 on during acquisition  
 off during delay  
 W40\_autocx modulated  
 DATA PROCESSING  
 Gauss apodization 0.069 sec  
 F1 DATA PROCESSING  
 Gauss apodization 0.024 sec  
 FT size 2048 x 4096  
 Total time 10 hr, 59 min

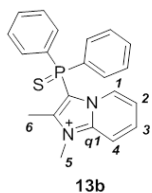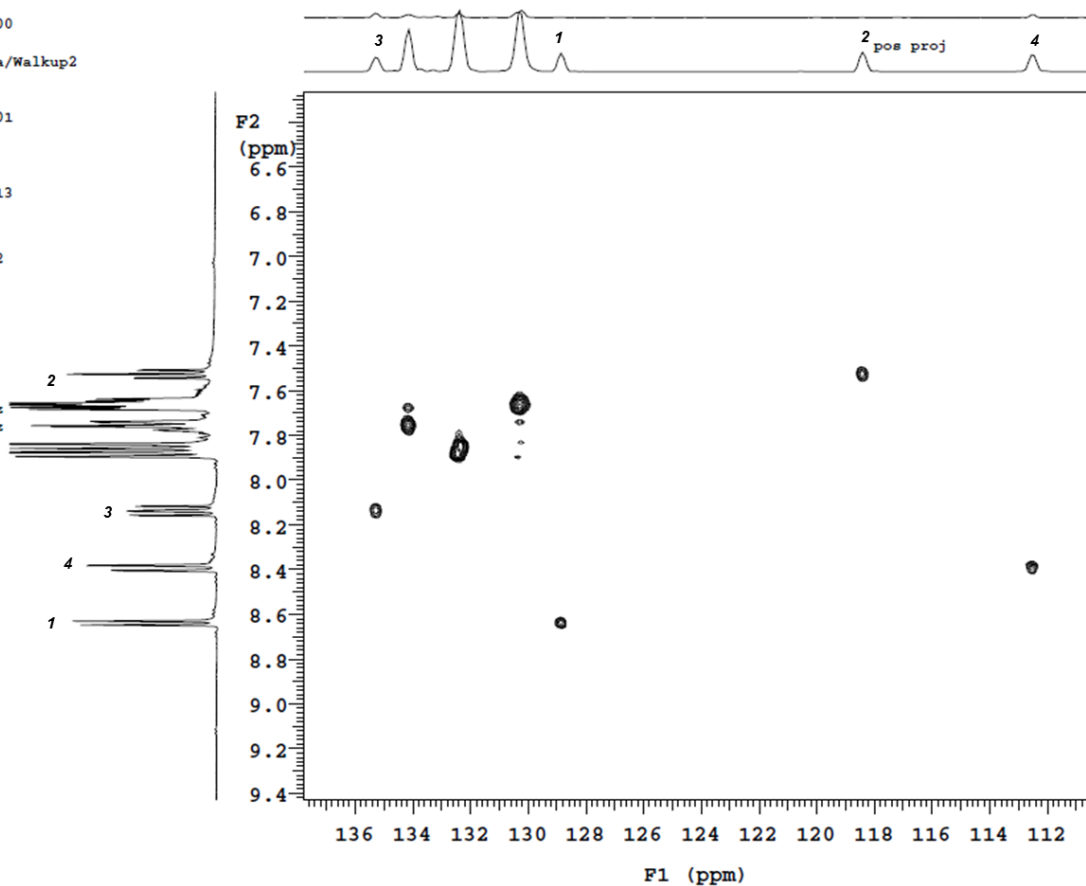

#### 4. gHMBCAD of 13b

Sample Name:  
SPA01-081  
Data Collected on:  
nmr2.ncats.nih.gov-vnmrs400  
Archive directory:  
/home/Walkup2/vnmrsys/data/Walkup2  
Sample directory:  
SPA01-081\_20130913\_01  
FidFile: SPA01-081\_gHMBCAD\_01

Pulse Sequence: **gHMBCAD**  
Solvent: dmsc  
Data collected on: Sep 14 2013

Temp. 25.0 C / 298.1 K  
Sample #46, Operator: Walkup2

Relax. delay 1.000 sec  
Acq. time 0.150 sec  
Width 6410.3 Hz  
2D Width 24125.5 Hz  
64 repetitions  
2 x 512 increments  
OBSERVE H1, 399.8111706 MHz  
DATA PROCESSING  
Sq. sine bell 0.075 sec  
F1 DATA PROCESSING  
Gauss apodization 0.020 sec  
FT size 2048 x 4096  
Total time 22 hr, 37 min

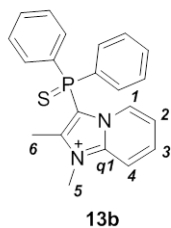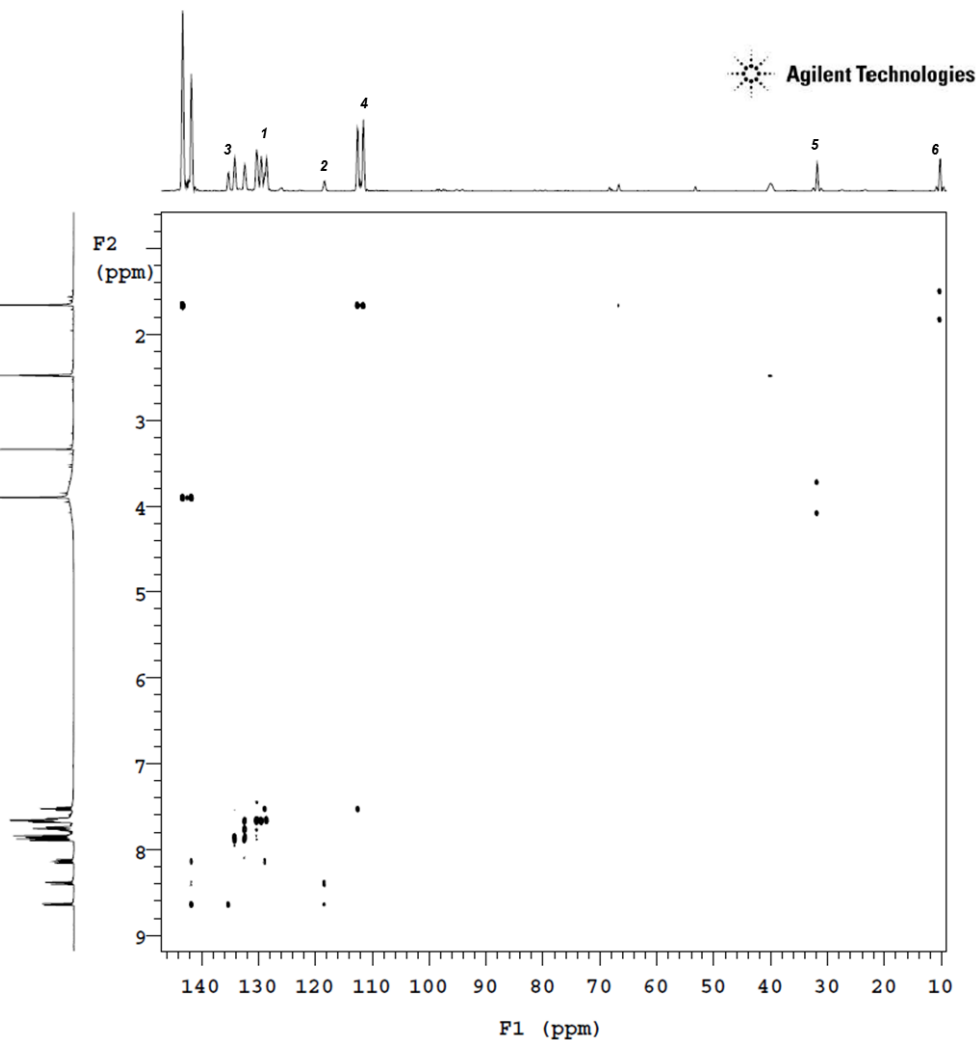

## 5. gHMBCAD of **13b** (expansion)

Sample Name:  
 SPA01-081  
 Data Collected on:  
 nmr2.ncats.nih.gov-vmrns400  
 Archive directory:  
 /home/Walkup2/vnmrsys/data/Walkup2  
 Sample directory:  
 SPA01-081\_20130913\_01  
 FidFile: SPA01-081\_gHMBCAD\_01  
 Pulse Sequence: **gHMBCAD**  
 Solvent: dmsd  
 Data collected on: Sep 14 2013  
 Temp. 25.0 C / 298.1 K  
 Sample #46, Operator: Walkup2  
 Relax. delay 1.000 sec  
 Acq. time 0.150 sec  
 Width 6410.3 Hz  
 2D Width 24125.5 Hz  
 64 repetitions  
 2 x 512 increments  
 OBSERVE H1, 399.8111706 MHz  
 DATA PROCESSING  
 Sq. sine bell 0.075 sec  
 F1 DATA PROCESSING  
 Gauss apodization 0.020 sec  
 FT size 2048 x 4096  
 Total time 22 hr, 37 min

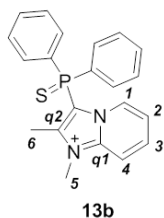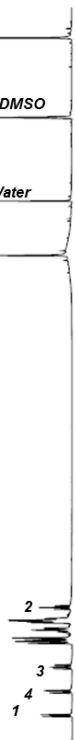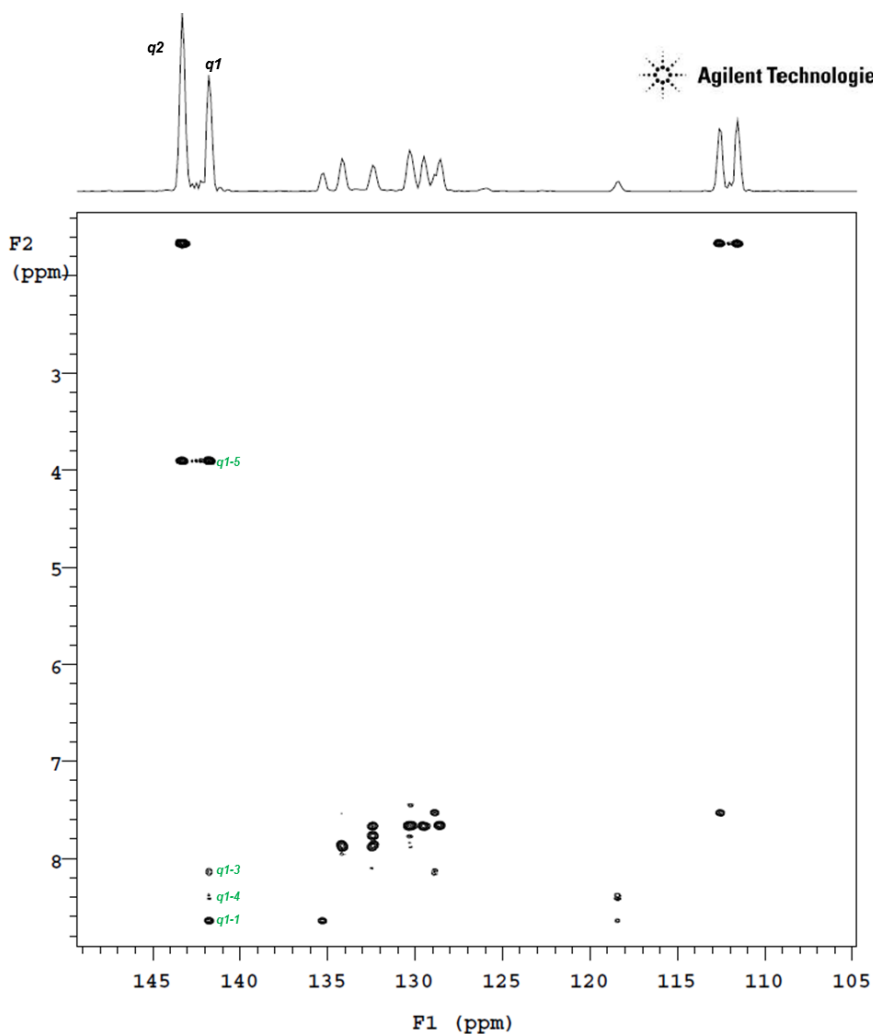



## 5. NOESY of 13b

Sample Name:  
SPA01-081\_NOESY  
Data Collected on:  
nmr1.bogus-vnmrs400  
Archive directory:  
/home/Walkup1/vnmrsys/data/patnaiks  
Sample directory:  
SPA01-081\_NOESY\_20130906\_01  
FidFile: SPA01-081\_NOESY\_NOESY\_01

Pulse Sequence: **NOESY**  
Solvent: dmsc  
Data collected on: Sep 7 2013

Temp. 25.0 C / 298.1 K  
Sample #26, Operator: patnaiks

Relax. delay 1.000 sec  
Acq. time 0.150 sec  
Width 3655.0 Hz  
2D Width 3655.0 Hz  
32 repetitions  
2 x 400 increments  
OBSERVE H1, 399.9388525 MHz  
DATA PROCESSING  
Gauss apodization 0.069 sec  
F1 DATA PROCESSING  
Gauss apodization 0.058 sec  
FT size 4096 x 4096  
Total time 10 hr, 1 min

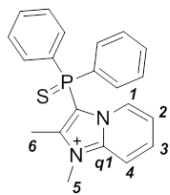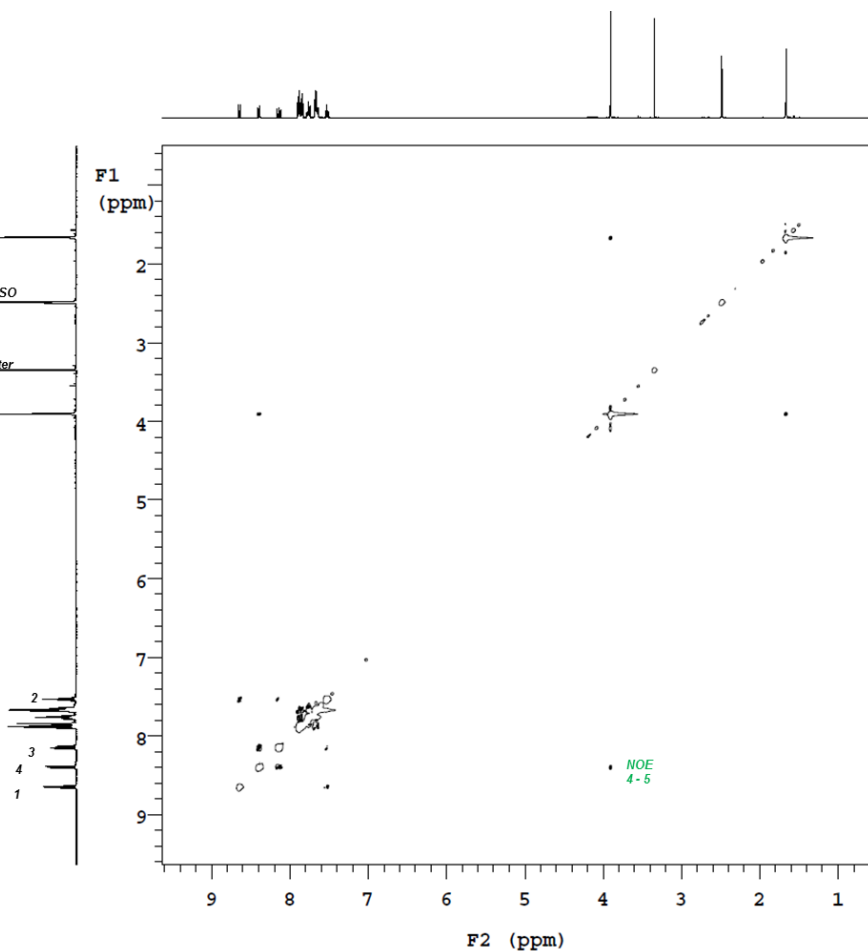

Supplement: NIHMS781422-supplement-supple_data.pdf [file NIHMS781422-supplement-supple_data.pdf]
